# Supplementary material for: Heart Rate Variability and Performance of Commercial Airline Pilots during Flight Simulations
Source: PubMed Central journal article supplement (PMC6352143; doi:10.3390/ijerph16020237), 2019-01-16
Supplement: ijerph-16-00237-s001.pdf [file ijerph-16-00237-s001.pdf]

## **Supplemental material**

### **Heart rate variability and performance of commercial airline pilots during flight simulations**

Xiaodong Cao<sup>1</sup>, Piers MacNaughton<sup>1</sup>, Leslie R. Cadet<sup>1</sup>, Jose Guillermo Cedeno-Laurent<sup>1</sup>, Skye Flanigan<sup>1</sup>, Jose Vallarino<sup>1</sup>, Deborah Donnelly-McLay<sup>1</sup>, David C. Christiani<sup>1,2</sup>, John D. Spengler<sup>1</sup>, Joseph G. Allen<sup>1,\*</sup>

#### **Affiliation**

<sup>1</sup> Department of Environmental Health, Harvard T.H. Chan School of Public Health, Boston, MA, USA.

<sup>2</sup> Department of Medicine, Massachusetts General Hospital/Harvard Medical School, Boston, MA, USA.

#### **Corresponding Author:**

Joseph G. Allen, DSc, MPH

Assistant Professor

Harvard T.H. Chan School of Public Health

401 Park Drive

Landmark Center, 404-L

Boston, MA 02215

e: JGAllen@hsph.harvard.edu

o: 617-384-8475

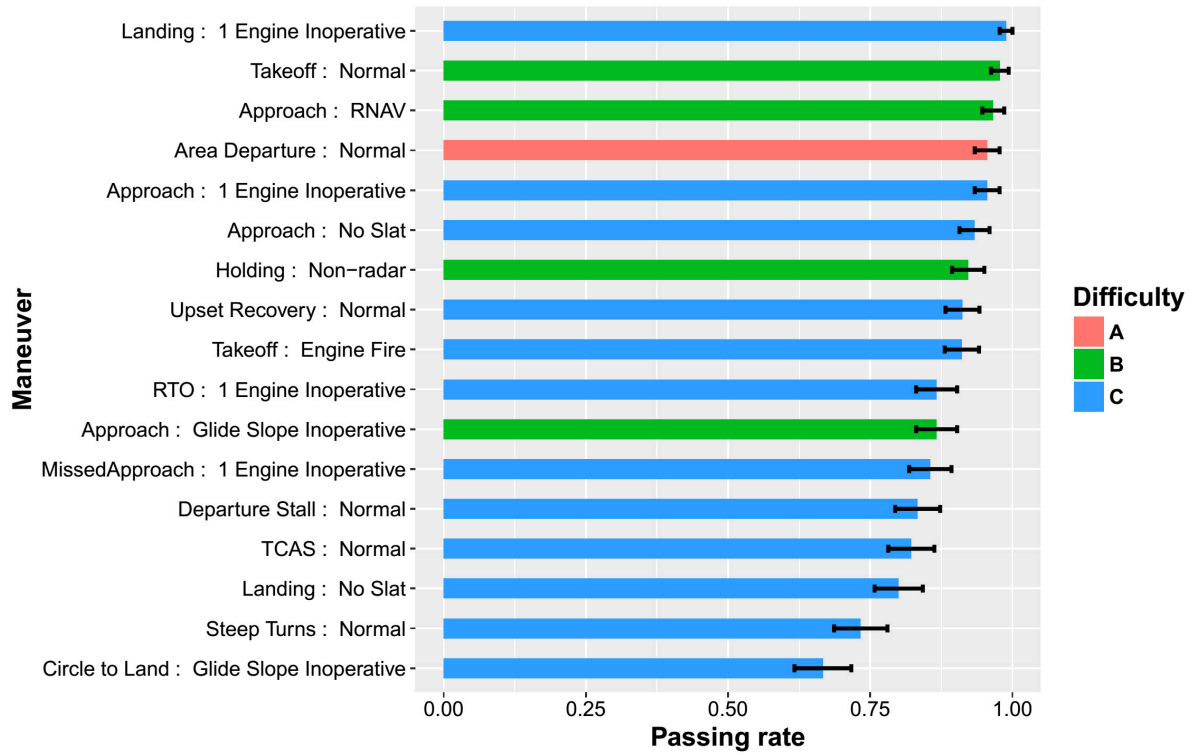

**Figure S1.** Overall passing rates of pilots on each maneuver in the flight simulator (the error bars represent the standard errors).

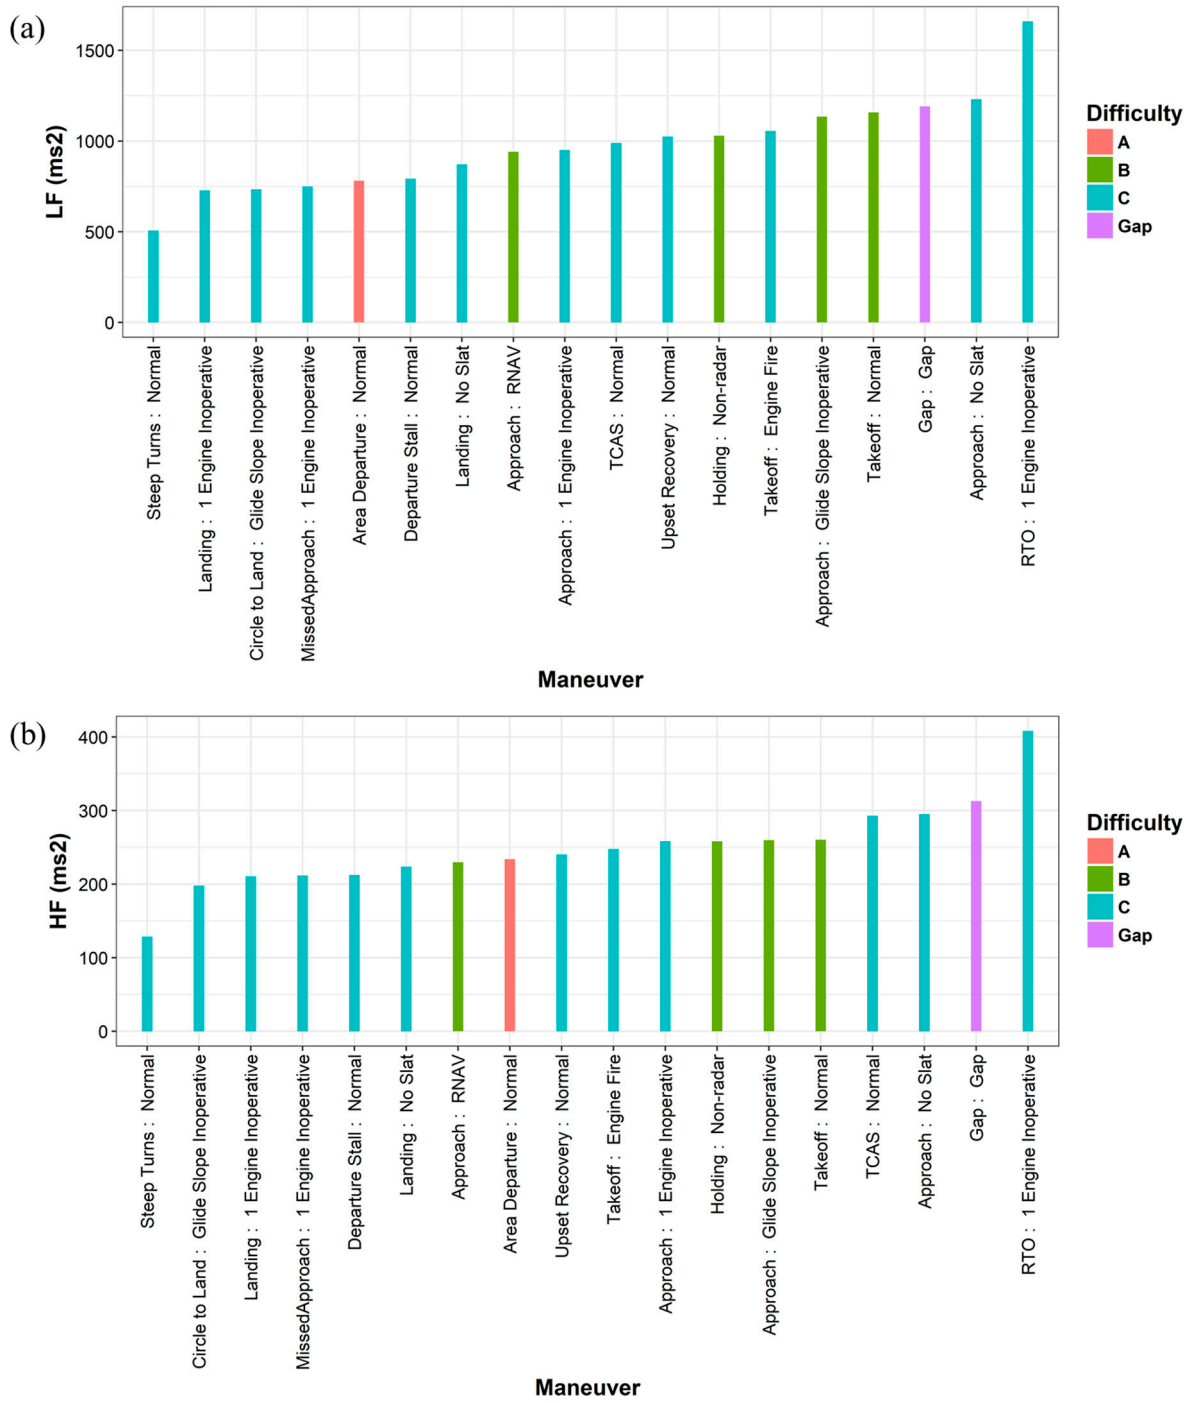

**Figure S2.** Average LF and HF power of HRV by flight maneuver types and difficulty.

**Table S1. Flight maneuvers and performance criteria.**

| Maneuver                           | Type                    | Maneuver Order |                                             |                                                           | Difficulty | Performance Metric                      | Description                                                                                                          |
|------------------------------------|-------------------------|----------------|---------------------------------------------|-----------------------------------------------------------|------------|-----------------------------------------|----------------------------------------------------------------------------------------------------------------------|
|                                    |                         | Boston         | NYC                                         | DC                                                        |            |                                         |                                                                                                                      |
| Takeoff                            | Normal                  | 1              | 3                                           | 2                                                         | B          | 1. Straight Heading during takeoff      | Absolute deviation of bank angle from 0 degrees during maneuver                                                      |
| Area Departure                     |                         |                |                                             |                                                           | A          | 2. Constant Pitch during Ascent         | Absolute deviation of pitch attitude from 15 degrees from 400-1500ft                                                 |
| Traffic Collision Avoidance (TCAS) |                         |                |                                             |                                                           | C          | 3. Altitude Loss during TCAS            | Change in altitude from beginning of TCAS to minimum/maximum altitude.                                               |
| Approach                           |                         |                |                                             |                                                           | C          | 4. Constant Altitude at Waypoint        | Absolute deviation of altitude from 1700ft at waypoint                                                               |
| Landing                            |                         |                |                                             |                                                           | C          | 5. Straight Heading during Landing      | Absolute deviation of bank angle from 0 degrees below 400ft of altitude                                              |
| Rejected Takeoff (RTO)             | 1 Engine Inoperative    | 2              | 1                                           | 3                                                         | C          | 6. Quick Deceleration after Malfunction | Time (s) to complete stop after beginning deceleration                                                               |
| Steep Turns                        | Normal                  |                |                                             |                                                           | C          | 7. Constant Bank during Steep Turns     | Absolute deviation of roll rate from 0 degrees/s during steep turns                                                  |
| Departure Stall                    |                         |                |                                             |                                                           | C          | 8. Smooth Recovery after Stall          | R <sup>2</sup> for a linear regression of the rate of airspeed increase after stall until return to initial airspeed |
| Upset Recovery                     |                         |                |                                             |                                                           | C          | 9. Smooth Recovery after Upset          | R <sup>2</sup> for a linear regression of altitude change after upset until return to 50% of initial altitude        |
| Holding                            | Non-radar               |                |                                             |                                                           | B          | 10. Constant Altitude during Holding    | Absolute deviation of altitude from 1500ft during holding                                                            |
| Approach                           | Glide Slope Inoperative | C              | 11. Constant Altitude at Waypoint           | Absolute deviation of altitude from 1500ft at waypoint    |            |                                         |                                                                                                                      |
| Circle to Land                     |                         |                | 12. Constant Altitude during Circle to Land | Absolute deviation of altitude from 700ft during maneuver |            |                                         |                                                                                                                      |
| Takeoff                            | Engine Fire             | 3              | 2                                           | 1                                                         | C          | 13. Straight Heading during takeoff     | Absolute deviation of bank angle from 0 degrees                                                                      |
| Approach                           | RNAV                    |                |                                             |                                                           | B          | 14. Straight Heading during Maneuver    | Absolute deviation of bank angle from 0 degrees                                                                      |
| Missed Approach                    | 1 Engine Inoperative    |                |                                             |                                                           | C          | 15. Altitude at missed approach         | Minimum altitude before rejecting landing                                                                            |
| Approach                           |                         |                |                                             |                                                           | C          | 16. Constant Altitude at Waypoint       | Absolute deviation of altitude from 1700ft at waypoint                                                               |
| Landing                            |                         |                |                                             |                                                           | C          | 17. Straight Heading during Landing     | Absolute deviation of bank angle from 0 degrees below 400ft of altitude                                              |

**Table S2.** Difference in mean HRV values by flight maneuver types (referent: Gap time), treating pilot as a random intercept.

|                                         | SDNN      |           |         | RMSSD    |           |         | LF/HF    |           |         |
|-----------------------------------------|-----------|-----------|---------|----------|-----------|---------|----------|-----------|---------|
|                                         | Estimate  | Std.Error | p-Value | Estimate | Std.Error | p-Value | Estimate | Std.Error | p-Value |
| Intercept                               | 36.04     | 2.33      | <0.001  | 24.93    | 1.86      | <0.001  | 5.82     | 0.52      | <0.001  |
| Gap time                                | Reference |           |         |          |           |         |          |           |         |
| Approach: 1 Engine Inoperative          | -4.10     | 0.22      | <0.001  | -2.45    | 0.17      | <0.001  | -0.06    | 0.08      | 0.489   |
| Approach: Glide Slope Inoperative       | -1.35     | 0.21      | <0.001  | -0.98    | 0.17      | <0.001  | 0.12     | 0.08      | 0.148   |
| Approach: No Slat                       | 0.20      | 0.22      | 0.375   | 0.25     | 0.17      | 0.150   | 0.33     | 0.08      | <0.001  |
| Approach: RNAV                          | -3.86     | 0.22      | <0.001  | -2.52    | 0.17      | <0.001  | -0.16    | 0.08      | 0.055   |
| Area Departure: Normal                  | -5.52     | 0.36      | <0.001  | -2.91    | 0.29      | <0.001  | -0.31    | 0.14      | 0.029   |
| Circle to Land: Glide Slope Inoperative | -7.47     | 0.32      | <0.001  | -4.92    | 0.25      | <0.001  | -0.48    | 0.12      | <0.001  |
| Departure Stall: Normal                 | -6.05     | 0.24      | <0.001  | -3.14    | 0.19      | <0.001  | -0.66    | 0.09      | <0.001  |
| Holding: Non-radar                      | -2.10     | 0.23      | <0.001  | -1.19    | 0.19      | <0.001  | -0.17    | 0.09      | 0.060   |
| Landing: 1 Engine Inoperative           | -6.50     | 0.52      | <0.001  | -4.64    | 0.41      | <0.001  | -0.03    | 0.20      | 0.882   |
| Landing: No Slat                        | -4.92     | 0.36      | <0.001  | -3.57    | 0.29      | <0.001  | -0.32    | 0.14      | 0.021   |
| Missed Approach: 1 Engine Inoperative   | -7.20     | 0.52      | <0.001  | -4.69    | 0.41      | <0.001  | -0.37    | 0.20      | 0.068   |
| RTO: 1 Engine Inoperative               | 4.56      | 0.62      | <0.001  | 2.69     | 0.49      | <0.001  | 0.17     | 0.24      | 0.472   |
| Steep Turns: Normal                     | -11.88    | 0.31      | <0.001  | -7.10    | 0.25      | <0.001  | -0.86    | 0.12      | <0.001  |
| Takeoff: Engine Fire                    | -3.19     | 0.50      | <0.001  | -2.91    | 0.40      | <0.001  | 0.31     | 0.19      | 0.105   |
| Takeoff: Normal                         | -0.19     | 0.55      | 0.734   | -0.46    | 0.44      | 0.296   | 1.10     | 0.21      | <0.001  |
| TCAS: Normal                            | -1.87     | 0.35      | <0.001  | 0.25     | 0.28      | 0.371   | -0.56    | 0.14      | <0.001  |
| Upset Recovery: Normal                  | -1.22     | 0.34      | <0.001  | -1.53    | 0.27      | <0.001  | 0.13     | 0.13      | 0.312   |

**Table S3.** The fixed effect estimates on LF and HF, controlling for examiner and flight profile number.

| Variable                                    | LF (ms <sup>2</sup> )<br>(R-squared = 0.258) |            |                  | HF (ms <sup>2</sup> )<br>(R-squared = 0.332) |            |         |
|---------------------------------------------|----------------------------------------------|------------|------------------|----------------------------------------------|------------|---------|
|                                             | Estimate                                     | Std. Error | p-Value          | Estimate                                     | Std. Error | p-Value |
| Intercept                                   | 191.72                                       | 111.10     | 0.085            | 86.75                                        | 32.77      | 0.008   |
| Age > 50                                    |                                              |            | 0.00 (Reference) |                                              |            |         |
| 41 < Age < 50                               | 827.46                                       | 62.54      | < 0.001          | 105.86                                       | 18.44      | < 0.001 |
| 30 < Age < 40                               | 885.57                                       | 56.61      | < 0.001          | 381.59                                       | 16.70      | < 0.001 |
| BMI > 30                                    |                                              |            | 0.00 (Reference) |                                              |            |         |
| 25 < BMI < 30                               | 202.04                                       | 66.02      | 0.002            | 75.66                                        | 19.47      | < 0.001 |
| 20 < BMI < 25                               | 10.75                                        | 61.56      | 0.861            | 36.01                                        | 18.16      | 0.048   |
| Regularly fly 65+ hours/month in simulation |                                              |            | 0.00 (Reference) |                                              |            |         |
| Regularly fly 65+ hours /month as a pilot   | 507.14                                       | 59.28      | < 0.001          | 22.38                                        | 17.48      | 0.201   |
| High CO <sub>2</sub>                        |                                              |            | 0.00 (Reference) |                                              |            |         |
| Medium CO <sub>2</sub>                      | 20.55                                        | 52.96      | 0.698            | -23.47                                       | 15.62      | 0.133   |
| Low CO <sub>2</sub>                         | 33.87                                        | 54.25      | 0.533            | -49.53                                       | 16.00      | 0.002   |
| Gap time                                    |                                              |            | 0.00 (Reference) |                                              |            |         |
| Difficulty A                                | -435.25                                      | 126.11     | 0.001            | -80.91                                       | 37.19      | 0.030   |
| Difficulty B                                | -139.25                                      | 99.10      | 0.160            | -53.21                                       | 29.23      | 0.069   |
| Difficulty C                                | -271.24                                      | 92.21      | 0.003            | -65.13                                       | 27.20      | 0.017   |
